# Supplementary material
Source: PubMed Central journal article supplement (PMC8935575)
Supplement: sj-pdf-1-jdr-10.1177_00220345211046614.pdf [file sj-pdf-1-jdr-10.1177_00220345211046614.pdf]

## **Supplementary Methods**

### Study Population:

The description of the study population has been described in our previously published study(Butali et al. 2019). In summary, ethical approvals were obtained at the Local Institution Review Boards (IRBs): Lagos University Teaching Hospital (ADM/DCST/HREC/VOL.XV/321), Obafemi Awolowo University Teaching Hospital (ERC/2011/12/01), Kwame Nkrumah University of Science and Technology (CHRPE/RC/018/130) and Addis Ababa University (003/10/surg). Cases were among those who participated in the Pan-African Association of Cleft Lip and Palate network for free surgical repair of clefts in Africa.

They were recruited across the 3 countries (Nigeria, Ghana and Ethiopia) by surgeons at cleft clinics and during surgical missions. Standardized phenotyping protocol was used by the surgeons for physical examination, taking clinical photographs and detailing the cleft phenotypes in a clinical database. Echocardiography was used to rule out congenital cardiac defects. Controls were recruited at immunization clinics and dental clinics at the same centers as cases and were age-, gender- and geographical location- matched. These controls were individuals born without any congenital defects. All individuals (cases and controls) recruited in this study were of African ancestry and indigenous to the 3 countries (Nigeria, Ghana and Ethiopia). All the families recruited were assigned a unique identifier (UNID) number and their data were remotely entered into a secured REDCap database(Harris et al. 2009). Deidentified samples were shipped to the Butali laboratory, United States.

### Genotyping and Data Cleaning:

The description of the methods for genotyping has been described in our previously published study (Butali et al. 2019). Briefly, over 2 million common SNPs and over 87, 000 rare coding variants in the African population were genotyped using the expanded Illumina MEGA v2 15070954 A2 (genome build 37). There were 3178 unique and 70 duplicates successfully genotyped samples. For the quality control (QC) process, we also genotyped 70 unique samples and 9 duplicates which were the HapMap controls.

A detailed description of the data cleaning process have been published (Oseni et al. 2018). Briefly, we checked for chromosomal anomalies, missingness, batch effects, relatedness (IBD/IBS) and confirmed the continental ancestry of our cohorts with respect to the HapMap samples using the methods published in Laurie et al. 2010 (Laurie et al. 2010). This was executed using the R package, SNPRelate, and GENESIS.

SNPs with minor allele frequency (MAF) < 3%, missingness  $\geq$  2%, discordant call in the 70 study duplicates >1, Mendelian errors >1 in 890 duos and trios or those deviating from Hardy-Weinberg equilibrium (HWE of  $p < 1.00 \times 10^{-3}$ ) were excluded from the analysis. A total of 3178 individuals (814 cases of CL/P, 205 cases of CPO and 2159 related and unrelated controls) made up of 1133 males and 2045 females (Table 1), passed these QC filters and were used in our analyses.

We did preimputation and postimputation quality control (QC) following genotyping of the cases and controls. Preimputation QC included filtering out genotypes with missing call rates  $\geq$ 2%, >1 discordant call in 70 study duplicates, >1 Mendelian errors in 890 duos and trios, an Hardy

Weinberg equilibrium (HWE) of  $P < 10^{-3}$  and a minor allele frequency (MAF) of  $< 0.01$ , among others. Our imputed SNPs have a MAF of  $\geq 0.01$  and a quality metric (INFO, score is an estimated quality measurement of imputation) of  $\geq 0.3$ . Choosing this threshold of 0.3 retained 69.5% of all imputed variants for downstream analyses. Imputation was carried out using IMPUTE2 (a genotype imputation and phasing program) into the 1KG Phase 3 reference imputation panel. The final data set comprised 3178 (1133 male and 2045 female) participants enrolled from Ethiopia (30%), Ghana (43%) and Nigeria (27%). The imputation yield was a total of  $\sim 45$  million SNPs out of which  $\sim 17$  million passed our QC and were used in our association analyses.

## Supplementary Figures

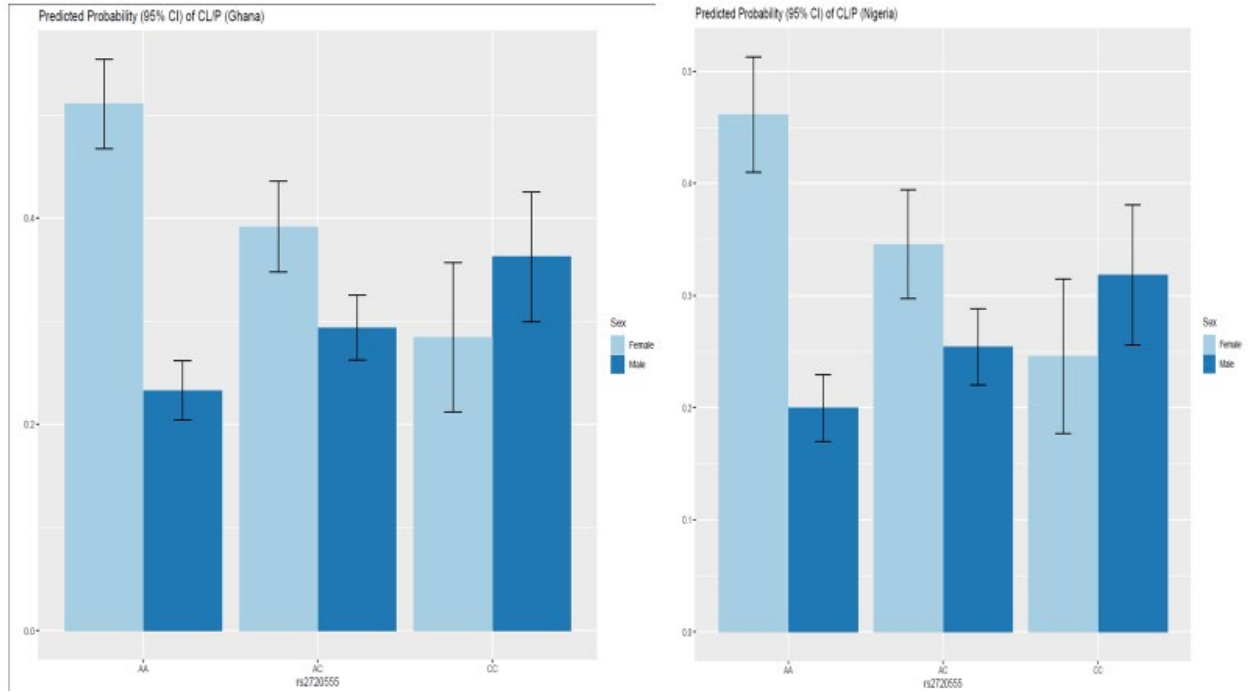

**Appendix Figure 1** : The 95% Confidence interval of the predicted probabilities (which estimated the odds) of NSCL/P for an additional alternate allele in the Ghanaian and Nigerian population. It is observed that for every additional minor allele, the odds of clefting in male increases while the effect is opposite for females.

## Supplementary Tables

|               | nsCL/P     | nsCPO      | Control     |
|---------------|------------|------------|-------------|
| <b>Female</b> | 377        | 133        | 1535        |
| <b>Male</b>   | 437        | 72         | 624         |
| <b>Total</b>  | <b>814</b> | <b>205</b> | <b>2159</b> |

**Appendix Table 1A:** The sex distribution of the cases (nsCL/P and nsCPO) and controls in the discovery samples. The controls are unaffected consisting of related and unrelated individuals of the same ancestry as the cases.

|               | nsCL/P     | nsCPO     | Control     |
|---------------|------------|-----------|-------------|
| <b>Female</b> | 173        | 52        | 734         |
| <b>Male</b>   | 172        | 31        | 696         |
| <b>Total</b>  | <b>345</b> | <b>83</b> | <b>1430</b> |

**Appendix Table 1B:** The sex distribution of the cases (nsCL/P and nsCPO) and controls in the replication samples. The controls are unaffected consisting of related and unrelated individuals of the same ancestry as the cases.

| Chromosome | BP       | SNP              | Ref | Alt | P_2DF    | P_GxSEX  | OR_GxSEX |
|------------|----------|------------------|-----|-----|----------|----------|----------|
| 8          | 17350807 | rs2720555        | C   | A   | 1.82E-08 | 2.43E-09 | 0.4511   |
| 8          | 1.46E+08 | exm732028        | G   | C   | 7.94E-08 | 6.12E-08 | 1.876    |
| 23         | 1.21E+08 | rs16996667       | A   | G   | 2.05E-07 | 4.61E-08 | 0.3957   |
| 12         | 26287230 | rs1383112        | A   | G   | 2.51E-07 | 4.04E-08 | 1.877    |
| 2          | 1.98E+08 | rs7575389        | G   | A   | 3.12E-07 | 8.94E-07 | 0.5863   |
| 7          | 47214444 | rs1347801        | A   | G   | 3.12E-07 | 5.90E-08 | 0.5466   |
| 15         | 91515638 | rs28393051       | G   | A   | 3.57E-07 | 7.17E-08 | 2.567    |
| 8          | 1.26E+08 | rs17663005       | G   | A   | 4.57E-07 | 2.16E-07 | 2.251    |
| 5          | 72451309 | rs6881806        | A   | G   | 4.76E-07 | 7.19E-08 | 2.276    |
| 11         | 60841281 | exm2259827       | A   | C   | 5.87E-07 | 1.20E-07 | 2.034    |
| 23         | 87228407 | rs12388812       | C   | A   | 7.43E-07 | 2.31E-05 | 1.822    |
| 11         | 94620479 | rs518361         | G   | A   | 8.25E-07 | 2.56E-07 | 0.401    |
| 19         | 51829311 | rs73551994       | A   | G   | 9.31E-07 | 1.38E-07 | 0.5278   |
| 18         | 74313259 | JHU_18.74313258  | A   | G   | 9.94E-07 | 1.86E-07 | 0.5536   |
| 11         | 1.35E+08 | JHU_11.134769410 | C   | G   | 1.06E-06 | 6.54E-07 | 1.729    |
| 3          | 1.6E+08  | rs6781583        | A   | G   | 1.32E-06 | 3.14E-07 | 1.764    |
| 15         | 92088994 | rs4129637        | G   | A   | 1.35E-06 | 7.51E-07 | 0.5315   |
| 8          | 1.3E+08  | rs17242358       | A   | G   | 1.43E-06 | 0.00065  | 1.905    |
| 5          | 74692776 | 5:74692776-A-G   | A   | G   | 1.48E-06 | 2.24E-07 | 2.044    |
| 1          | 1.5E+08  | exm93887         | G   | A   | 1.61E-06 | 2.47E-07 | 3.159    |
| 1          | 78976570 | rs6701594        | A   | G   | 1.64E-06 | 4.65E-07 | 2.493    |
| 16         | 83058508 | rs11860936       | G   | A   | 1.69E-06 | 5.51E-07 | 3.333    |
| 17         | 65000219 | exm2264647       | C   | A   | 1.73E-06 | 7.02E-07 | 1.708    |
| 1          | 2.49E+08 | rs6695844        | A   | G   | 1.80E-06 | 3.41E-07 | 1.816    |
| 1          | 2.49E+08 | rs11205415       | A   | C   | 1.99E-06 | 3.85E-07 | 1.753    |
| 11         | 1.08E+08 | rs17693854       | A   | T   | 2.03E-06 | 3.26E-07 | 2.726    |
| 12         | 26265632 | rs7977928        | A   | G   | 2.21E-06 | 6.62E-07 | 1.921    |
| 10         | 1.08E+08 | rs10884283       | G   | A   | 2.22E-06 | 9.12E-07 | 1.992    |
| 9          | 27295857 | JHU_9.27295856   | A   | G   | 2.25E-06 | 6.03E-07 | 0.5724   |
| 10         | 95790063 | rs12254065       | A   | G   | 2.28E-06 | 5.26E-07 | 1.842    |
| 6          | 39324581 | rs6924090        | A   | G   | 2.50E-06 | 4.46E-07 | 1.833    |
| 7          | 1.08E+08 | rs2193241        | A   | G   | 2.55E-06 | 4.30E-07 | 1.762    |
| 16         | 83004620 | rs4782739        | A   | G   | 2.67E-06 | 5.71E-07 | 2.925    |
| 18         | 74869242 | rs2850325        | A   | T   | 2.88E-06 | 4.53E-07 | 0.4165   |
| 8          | 62795087 | rs16928045       | G   | A   | 2.97E-06 | 7.58E-07 | 1.717    |
| 5          | 1.02E+08 | rs6878284        | G   | A   | 3.12E-06 | 0.000282 | 1.542    |
| 23         | 71198116 | kgp22775447      | G   | A   | 3.18E-06 | 7.00E-07 | 2.022    |

|    |          |                 |   |   |          |          |        |
|----|----------|-----------------|---|---|----------|----------|--------|
| 17 | 29652456 | rs11867465      | A | G | 3.21E-06 | 5.22E-07 | 0.5797 |
| 2  | 2.37E+08 | rs6730534       | A | G | 3.26E-06 | 6.87E-07 | 0.565  |
| 9  | 1.17E+08 | rs12377342      | A | G | 3.28E-06 | 5.82E-07 | 2.218  |
| 1  | 11711176 | JHU_1.11711175  | A | C | 3.29E-06 | 5.04E-07 | 1.702  |
| 15 | 32200523 | rs2001347       | G | C | 3.38E-06 | 6.97E-07 | 2.812  |
| 11 | 2298259  | rs4929971       | A | G | 3.48E-06 | 1.13E-06 | 2.06   |
| 6  | 33099166 | JHU_6.33099165  | C | G | 3.64E-06 | 5.59E-07 | 1.686  |
| 10 | 16088496 | rs75544249      | G | A | 3.68E-06 | 4.01E-06 | 2.189  |
| 5  | 1.02E+08 | rs1542296       | A | G | 3.71E-06 | 0.00031  | 1.537  |
| 11 | 1.3E+08  | rs7125179       | A | G | 3.72E-06 | 5.79E-07 | 1.954  |
| 13 | 47709882 | rs2567674       | G | A | 3.76E-06 | 5.91E-07 | 1.69   |
| 11 | 59169295 | rs11604216      | G | A | 3.78E-06 | 2.31E-06 | 2.042  |
| 11 | 2297093  | JHU_11.2297092  | A | G | 3.83E-06 | 1.41E-06 | 2.17   |
| 5  | 1.02E+08 | JHU_5.101796593 | G | A | 4.07E-06 | 0.000292 | 1.54   |
| 11 | 97196848 | rs7943263       | A | G | 4.31E-06 | 7.45E-07 | 1.928  |
| 17 | 58872391 | rs7210374       | A | G | 4.40E-06 | 8.02E-07 | 1.761  |
| 2  | 1.98E+08 | rs787994        | G | A | 4.45E-06 | 1.00E-05 | 1.582  |
| 2  | 12322109 | rs12996777      | A | G | 4.67E-06 | 7.24E-07 | 2.707  |
| 10 | 9863986  | rs10905625      | C | A | 4.71E-06 | 1.37E-06 | 2.134  |
| 3  | 38847152 | rs7627881       | A | G | 4.89E-06 | 6.20E-05 | 1.646  |
| 17 | 29616632 | rs8078423       | A | G | 5.03E-06 | 7.83E-07 | 0.5797 |
| 2  | 20304899 | rs907864        | C | A | 5.20E-06 | 8.28E-07 | 1.769  |
| 19 | 51886275 | JHU_19.51886274 | A | G | 5.27E-06 | 8.64E-07 | 1.835  |
| 23 | 87240701 | rs10126101      | A | C | 5.38E-06 | 0.00025  | 1.67   |
| 3  | 1.88E+08 | rs9290877       | G | A | 5.45E-06 | 3.28E-05 | 2.139  |
| 5  | 1.02E+08 | rs1584717       | C | G | 5.46E-06 | 0.000513 | 1.512  |
| 5  | 1.02E+08 | JHU_5.101725341 | A | G | 5.46E-06 | 0.000513 | 1.512  |
| 5  | 1.02E+08 | exm-rs1584717   | C | G | 5.48E-06 | 0.000499 | 1.514  |
| 5  | 11742434 | JHU_5.11742433  | C | G | 5.53E-06 | 8.83E-07 | 0.5797 |
| 15 | 41421648 | JHU_15.41421647 | A | G | 5.56E-06 | 1.24E-06 | 0.5343 |
| 5  | 1.02E+08 | JHU_5.101700952 | G | A | 5.61E-06 | 0.000523 | 1.511  |
| 16 | 89763263 | 16:89763263-TC  | G | A | 5.79E-06 | 1.32E-06 | 1.736  |
| 4  | 1.28E+08 | JHU_4.127505484 | A | G | 5.83E-06 | 1.74E-06 | 2.722  |
| 19 | 51886922 | rs7250000       | G | A | 5.88E-06 | 9.98E-07 | 1.826  |
| 12 | 65638072 | JHU_12.65638071 | C | A | 5.95E-06 | 9.42E-07 | 1.638  |
| 14 | 99480422 | rs1873661       | A | C | 6.39E-06 | 3.08E-06 | 2.537  |
| 3  | 42270787 | JHU_3.42270786  | A | T | 6.48E-06 | 1.02E-06 | 2.318  |
| 6  | 33132931 | rs2855455       | G | A | 6.48E-06 | 1.12E-06 | 0.5822 |
| 5  | 74935825 | rs34344         | G | A | 6.60E-06 | 1.05E-06 | 1.9    |
| 20 | 24024681 | JHU_20.24024680 | A | G | 6.71E-06 | 2.61E-05 | 1.855  |
| 6  | 32171683 | rs2071277       | G | A | 6.80E-06 | 1.19E-05 | 1.632  |

|    |          |                      |   |   |          |          |        |
|----|----------|----------------------|---|---|----------|----------|--------|
| 17 | 58828402 | rs11655927           | A | G | 7.09E-06 | 1.39E-06 | 1.737  |
| 4  | 43840953 | rs2715650            | G | A | 7.09E-06 | 1.13E-06 | 2.177  |
| 11 | 3128774  | rs3741353            | G | A | 7.13E-06 | 1.13E-06 | 2.395  |
| 11 | 758446   | JHU_11.758445        | G | A | 7.19E-06 | 1.24E-06 | 2.129  |
| 11 | 1.3E+08  | rs620263             | A | G | 7.27E-06 | 1.15E-06 | 1.867  |
| 8  | 281208   | JHU_8.281207         | A | C | 7.29E-06 | 1.20E-06 | 1.865  |
| 16 | 73851099 | rs8045441            | C | A | 7.29E-06 | 1.16E-06 | 0.5639 |
| 5  | 1.02E+08 | rs1562960            | G | A | 7.29E-06 | 0.00062  | 1.503  |
| 15 | 73554544 | exm2267843           | A | G | 7.41E-06 | 2.12E-06 | 1.737  |
| 9  | 1.07E+08 | JHU_9.107344827      | A | G | 7.51E-06 | 2.08E-06 | 1.685  |
| 16 | 8084800  | rs7193708            | G | A | 7.60E-06 | 2.67E-06 | 0.5891 |
| 3  | 88086902 | rs9880959            | G | A | 7.60E-06 | 1.23E-06 | 0.56   |
| 5  | 1.02E+08 | JHU_5.101763548      | G | A | 7.67E-06 | 0.000609 | 1.504  |
| 11 | 1.3E+08  | rs7103088            | G | A | 7.69E-06 | 1.43E-06 | 2.063  |
| 14 | 36964744 | rs986877             | A | G | 7.70E-06 | 1.37E-06 | 2.193  |
| 14 | 36964744 | JHU_14.36964743      | A | G | 7.74E-06 | 1.38E-06 | 2.192  |
| 6  | 33131734 | exm-rs2257126        | A | G | 7.78E-06 | 1.29E-06 | 0.5837 |
| 12 | 26272824 | rs10842678           | C | A | 7.90E-06 | 4.84E-06 | 1.804  |
| 9  | 14346208 | rs12343468           | G | A | 7.93E-06 | 1.65E-06 | 1.83   |
| 11 | 97128693 | rs2555331            | A | G | 8.05E-06 | 1.41E-06 | 1.833  |
| 20 | 6506199  | rs75325296           | G | A | 8.21E-06 | 1.55E-06 | 0.4583 |
| 23 | 56079984 | JHU_X.56079983       | A | C | 8.22E-06 | 4.65E-06 | 2.001  |
| 8  | 1.46E+08 | rs2721193            | C | A | 8.31E-06 | 6.28E-06 | 0.5509 |
| 23 | 1.12E+08 | JHU_X.112086858      | C | A | 8.44E-06 | 1.86E-05 | 1.967  |
| 11 | 1.28E+08 | rs10790956           | A | G | 8.63E-06 | 2.19E-06 | 1.865  |
| 6  | 75682566 | rs4706591            | A | G | 8.76E-06 | 2.32E-06 | 1.792  |
| 9  | 95845152 | rs9696357            | A | G | 8.78E-06 | 0.4626   | 1.1    |
| 16 | 84972920 | rs17189009           | G | A | 8.93E-06 | 1.57E-06 | 2.296  |
| 10 | 1.3E+08  | JHU_10.12959563<br>5 | G | A | 9.03E-06 | 2.05E-06 | 3.244  |
| 1  | 2.49E+08 | rs12029054           | A | C | 9.06E-06 | 1.84E-06 | 1.685  |
| 20 | 36932676 | exm2254258           | C | G | 9.16E-06 | 2.43E-06 | 1.844  |
| 5  | 1.02E+08 | exm-rs1502844        | G | A | 9.21E-06 | 0.000706 | 1.502  |
| 20 | 24042329 | exm2272924           | A | G | 9.48E-06 | 7.74E-05 | 1.856  |
| 11 | 1.3E+08  | rs747180             | A | G | 9.89E-06 | 1.78E-06 | 1.704  |
| 2  | 1.45E+08 | rs12612659           | G | C | 9.95E-06 | 1.68E-06 | 0.597  |

**Appendix Table 2:** Table shows the SNPs with suggestive p value at the joint test (P\_2DF) and their corresponding p values at the GxSex (P\_GxSEX) analysis. The odds (risk) of clefting as a result of this SNP is also reported in this table (OR\_GxSEX).



|                 | AA (ADD = 0) | Aa (ADD = 1) | Aa (ADD = 2) |
|-----------------|--------------|--------------|--------------|
| Male Cases      | 353          | 138          | 18           |
| Female Cases    | 286          | 181          | 43           |
| Male Controls   | 347          | 234          | 43           |
| Female Controls | 982          | 477          | 76           |

**Appendix Table 3:** Sex specific Allelic distribution of Reference (A) and Alternate (a) alleles in cases and controls for the Genome-wide GxSex Interaction most significant locus (rs2720555).

| Cleft type | Chromosome location | SNP       | REF/ALT | Females               |          | Males                |          |
|------------|---------------------|-----------|---------|-----------------------|----------|----------------------|----------|
|            |                     |           |         | OR [CI]               | P-values | OR [CI]              | P-values |
| nsOFC      | 8: 17493298         | rs2720555 | T/G     | 1.30<br>[1.02, 1.65]  | 0.037    | 0.86<br>[0.65, 1.14] | 0.286    |
| nsCLO      | 8: 17493298         | rs2720555 | T/G     | 1.62<br>[1.09, 2.40]  | 0.018    | 0.92<br>[0.58, 1.47] | 0.729    |
| nsCLP      | 8: 17493298         | rs2720555 | T/G     | 1.25<br>[0.84, 1.85]  | 0.277    | 0.79<br>[0.53, 1.19] | 0.262    |
| nsCL/P     | 8: 17493298         | rs2720555 | T/G     | 1.33<br>[0.999, 1.78] | 0.051    | 0.81<br>[0.59, 1.13] | 0.215    |

**Appendix Table 4:** Sex-specific replication analysis result showing the risk of cleft due to the loci in females and males.
